# Supplementary material
Source: ML conference proceedings conference paper supplement (https://openaccess.thecvf.com/content/CVPR_2020/html/Qian_Hierarchically_Robust_Representation_CVPR_2020_paper.html)
Supplement: Supplementary file 1 [file Qian_Hierarchically_Robust_Representation_CVPR_2020_supplemental.pdf]

# Hierarchically Robust Representation Learning Supplementary

Qi Qian<sup>1</sup> Juhua Hu<sup>2</sup> Hao Li<sup>1</sup>

<sup>1</sup>Alibaba Group

<sup>2</sup>School of Engineering and Technology

University of Washington, Tacoma, USA

{qi.qian, lihao.lh}@alibaba-inc.com juhuah@uw.edu

## 1. Proof of Theorem 1

*Proof.* Due to the smoothness, we have

$$\ell(\hat{\mathbf{x}}_i, y_i; \theta) \leq \ell(\mathbf{x}_i, y_i; \theta) + \langle \nabla_{\mathbf{x}_i} \ell, \hat{\mathbf{x}}_i - \mathbf{x}_i \rangle + \frac{L_{\mathbf{x}}}{2} \|\hat{\mathbf{x}}_i - \mathbf{x}_i\|_F^2$$

So

$$\begin{aligned} \ell(\hat{\mathbf{x}}_i, y_i; \theta) - \frac{\lambda_w}{2} \|\hat{\mathbf{x}}_i - \mathbf{x}_i\|_F^2 &\leq \ell(\mathbf{x}_i, y_i; \theta) + \langle \nabla_{\mathbf{x}_i} \ell, \hat{\mathbf{x}}_i - \mathbf{x}_i \rangle \\ &\quad - \frac{\lambda_w - L_{\mathbf{x}}}{2} \|\hat{\mathbf{x}}_i - \mathbf{x}_i\|_F^2 \end{aligned}$$

When  $\lambda_w$  is sufficiently large as  $\lambda_w > L_{\mathbf{x}}$ , R.H.S. is bounded and

$$\begin{aligned} \ell(\hat{\mathbf{x}}_i, y_i; \theta) - \frac{\lambda_w}{2} \|\hat{\mathbf{x}}_i - \mathbf{x}_i\|_F^2 \\ \leq \ell(\mathbf{x}_i, y_i; \theta) + \frac{1}{2(\lambda_w - L_{\mathbf{x}})} \|\nabla_{\mathbf{x}_i} \ell\|_F^2 \end{aligned}$$

Since  $\nabla_{\mathbf{x}} \ell(\cdot)$  is  $L_{\theta}$ -Lipschitz continuous, we have

$$\begin{aligned} \|\nabla_{\mathbf{x}} \ell(\mathbf{x}; \theta)\|_F^2 &\leq 2\|\nabla_{\mathbf{x}} \ell(\mathbf{x}; \theta) - \nabla_{\mathbf{x}} \ell(\mathbf{x}; \mathbf{0})\|_F^2 \\ &\quad + 2\|\nabla_{\mathbf{x}} \ell(\mathbf{x}; \mathbf{0})\|_F^2 \\ &\leq 2L_{\theta}^2 \|\theta\|_F^2 + 2\|\nabla_{\mathbf{x}} \ell(\mathbf{x}; \mathbf{0})\|_F^2 \end{aligned}$$

Note that  $\|\nabla_{\mathbf{x}} \ell(\mathbf{x}; \mathbf{0})\|_F = 0$  in many convolutional neural networks. The bound can be improved and the original subproblem can be bounded as

$$\max_{\hat{\mathbf{x}}_i \in \mathbf{X}} \ell(\hat{\mathbf{x}}_i, y_i; \theta) - \frac{\lambda_w}{2} \|\hat{\mathbf{x}}_i - \mathbf{x}_i\|_F^2 \leq \ell(\mathbf{x}_i, y_i; \theta) + \frac{\gamma}{2} \|\theta\|_F^2$$

where  $\gamma = \frac{L_{\theta}^2}{\lambda_w - L_{\mathbf{x}}}$ . □

## 2. Proof of Theorem 2

*Proof.* We consider the augmented examples as

$$\tilde{\mathbf{x}}_i = \mathbf{x}_i + \tau \mathbf{z}_i$$

According to the smoothness, we have

$$\begin{aligned} \ell(\hat{\mathbf{x}}_i, y_i; \theta) - \frac{\lambda_w}{2} \|\hat{\mathbf{x}}_i - \mathbf{x}_i\|_F^2 &\leq \ell(\tilde{\mathbf{x}}_i, y_i; \theta) + \langle \nabla_{\tilde{\mathbf{x}}_i} \ell, \hat{\mathbf{x}}_i - \tilde{\mathbf{x}}_i \rangle \\ &\quad + \frac{L_{\mathbf{x}}}{2} \|\hat{\mathbf{x}}_i - \tilde{\mathbf{x}}_i\|_F^2 - \frac{\lambda_w}{2} \|\hat{\mathbf{x}}_i - \mathbf{x}_i\|_F^2 \\ &= \ell(\tilde{\mathbf{x}}_i, y_i; \theta) + \langle \nabla_{\tilde{\mathbf{x}}_i} \ell - \tau L_{\mathbf{x}} \mathbf{z}_i, \hat{\mathbf{x}}_i - \mathbf{x}_i \rangle - \tau \langle \nabla_{\tilde{\mathbf{x}}_i} \ell, \mathbf{z}_i \rangle \\ &\quad + \frac{L_{\mathbf{x}} \tau^2}{2} \|\mathbf{z}_i\|_F^2 - \frac{\lambda_w - L_{\mathbf{x}}}{2} \|\hat{\mathbf{x}}_i - \mathbf{x}_i\|_F^2 \\ &\leq \ell(\tilde{\mathbf{x}}_i, y_i; \theta) + \frac{\|\nabla_{\tilde{\mathbf{x}}_i} \ell - \tau L_{\mathbf{x}} \mathbf{z}_i\|_F^2}{2(\lambda_w - L_{\mathbf{x}})} - \tau \langle \nabla_{\tilde{\mathbf{x}}_i} \ell, \mathbf{z}_i \rangle \\ &\quad + \frac{L_{\mathbf{x}} \tau^2}{2} \|\mathbf{z}_i\|_F^2 \\ &= \ell(\tilde{\mathbf{x}}_i, y_i; \theta) + \frac{\|\nabla_{\tilde{\mathbf{x}}_i} \ell\|_F^2}{2(\lambda_w - L_{\mathbf{x}})} \\ &\quad + \frac{\lambda_w}{\lambda_w - L_{\mathbf{x}}} \left( \frac{\tau^2 L_{\mathbf{x}} \|\mathbf{z}_i\|_F^2}{2} - \tau \langle \nabla_{\tilde{\mathbf{x}}_i} \ell, \mathbf{z}_i \rangle \right) \\ &\leq \ell(\tilde{\mathbf{x}}_i, y_i; \theta) + \frac{\gamma}{2} \|\theta\|_F^2 \\ &\quad + \frac{\lambda_w}{\lambda_w - L_{\mathbf{x}}} \left( \frac{\tau^2 L_{\mathbf{x}} \|\mathbf{z}_i\|_F^2}{2} - \tau \langle \nabla_{\tilde{\mathbf{x}}_i} \ell - \nabla_{\mathbf{x}_i} \ell, \mathbf{z}_i \rangle - \tau \langle \nabla_{\mathbf{x}_i} \ell, \mathbf{z}_i \rangle \right) \\ &\leq \ell(\tilde{\mathbf{x}}_i, y_i; \theta) + \frac{\gamma}{2} \|\theta\|_F^2 \\ &\quad + \frac{\lambda_w}{\lambda_w - L_{\mathbf{x}}} \left( \frac{\tau^2 L_{\mathbf{x}} \|\mathbf{z}_i\|_F^2}{2} + \tau \|\nabla_{\tilde{\mathbf{x}}_i} \ell - \nabla_{\mathbf{x}_i} \ell\| \|\mathbf{z}_i\| - \tau \langle \nabla_{\mathbf{x}_i} \ell, \mathbf{z}_i \rangle \right) \\ &\leq \ell(\tilde{\mathbf{x}}_i, y_i; \theta) + \frac{\gamma}{2} \|\theta\|_F^2 \\ &\quad + \frac{\lambda_w}{\lambda_w - L_{\mathbf{x}}} \left( \frac{3\tau^2 L_{\mathbf{x}} \|\mathbf{z}_i\|_F^2}{2} - \tau \langle \nabla_{\mathbf{x}_i} \ell, \mathbf{z}_i \rangle \right) \\ &= \ell(\tilde{\mathbf{x}}_i, y_i; \theta) + \frac{\gamma}{2} \|\theta\|_F^2 - \frac{\lambda_w}{\lambda_w - L_{\mathbf{x}}} \frac{\langle \nabla_{\mathbf{x}_i} \ell, \mathbf{z}_i \rangle^2}{6L_{\mathbf{x}} \|\mathbf{z}_i\|_F^2} \end{aligned}$$

The last equation is from setting  $\tau$  to optimum as

$$\tau = \frac{\langle \nabla_{\mathbf{x}_i} \ell, \mathbf{z}_i \rangle}{3L_{\mathbf{x}} \|\mathbf{z}_i\|_F^2}$$

□

### 3. Proof of Theorem 3

*Proof.* For an arbitrary distribution  $\mathbf{q}$ , we have

$$\begin{aligned}
E[\|\mathbf{q}_{t+1} - \mathbf{q}\|_2^2] &= E[\|\mathcal{P}_\Delta(\mathbf{q}_t + \eta_t g_t) - \mathbf{q}\|_2^2] \\
&\leq E[\|\mathbf{q}_t + \eta_t g_t - \mathbf{q}\|_2^2] \\
&= E[\|\mathbf{q}_t - \mathbf{q}\|_2^2 + 2\eta_t(\mathbf{q}_t - \mathbf{q})^\top g_t + \eta_t^2 \|g_t\|_2^2] \\
&\leq E[\|\mathbf{q}_t - \mathbf{q}\|_2^2 + \eta_t^2 \mu^2 \\
&\quad + 2\eta_t(\mathcal{L}(\mathbf{q}_t, \theta_t) - \mathcal{L}(\mathbf{q}, \theta_t) - \frac{\lambda}{2}\|\mathbf{q}_t - \mathbf{q}\|_2^2)]
\end{aligned}$$

□

The last inequality is from the fact that the objective is  $\lambda$ -strongly concave in  $\mathbf{q}$  and the observed gradient is unbiased. Therefore, we have

$$\begin{aligned}
E[\mathcal{L}(\mathbf{q}, \theta_t) - \mathcal{L}(\mathbf{q}_t, \theta_t)] &\leq \frac{E[\|\mathbf{q}_t - \mathbf{q}\|_2^2] - E[\|\mathbf{q}_{t+1} - \mathbf{q}\|_2^2]}{2\eta_t} \\
&\quad - \frac{\lambda}{2}\|\mathbf{q}_t - \mathbf{q}\|_2^2 + \frac{\eta_t}{2}\mu^2
\end{aligned}$$

When  $\eta_t = \frac{1}{\lambda t}$ , we have

$$\begin{aligned}
E[\mathcal{L}(\mathbf{q}, \theta_t) - \mathcal{L}(\mathbf{q}_t, \theta_t)] &\leq \frac{\lambda t}{2}(E[\|\mathbf{q}_t - \mathbf{q}\|_2^2] - E[\|\mathbf{q}_{t+1} - \mathbf{q}\|_2^2]) \\
&\quad - \frac{\lambda}{2}\|\mathbf{q}_t - \mathbf{q}\|_2^2 + \frac{1}{2\lambda t}\mu^2
\end{aligned}$$

When  $\eta_t = \frac{1}{\lambda t c}$ , we have

$$\begin{aligned}
E[\mathcal{L}(\mathbf{q}, \theta_t) - \mathcal{L}(\mathbf{q}_t, \theta_t)] &\leq \frac{\lambda t c}{2}(E[\|\mathbf{q}_t - \mathbf{q}\|_2^2] - E[\|\mathbf{q}_{t+1} - \mathbf{q}\|_2^2]) \\
&\quad - \frac{\lambda}{2}\|\mathbf{q}_t - \mathbf{q}\|_2^2 + \frac{1}{2\lambda t c}\mu^2
\end{aligned}$$

We assume that  $\eta_t = \frac{1}{c\lambda t}$  and  $c > 1$  for the first  $s$  iterations and then  $\eta_t = \frac{1}{\lambda t}$ . So we have

$$\begin{aligned}
\sum_t^T E[\mathcal{L}(\mathbf{q}, \theta_t) - \mathcal{L}(\mathbf{q}_t, \theta_t)] &= \sum_{t=1}^s E[\mathcal{L}(\mathbf{q}, \theta_t) - \mathcal{L}(\mathbf{q}_t, \theta_t)] \\
&\quad + \sum_{t=s+1}^T E[\mathcal{L}(\mathbf{q}, \theta_t) - \mathcal{L}(\mathbf{q}_t, \theta_t)] \\
&\leq \sum_{t=1}^s \left( \left( \frac{c\lambda}{2} - \frac{\lambda}{2} \right) E[\|\mathbf{q}_t - \mathbf{q}\|_2^2] + \frac{1}{2\lambda t c} \mu^2 \right) + \sum_{t=s+1}^T \frac{1}{2\lambda t} \mu^2 \\
&\leq s\lambda(c-1) + \frac{\mu^2}{2\lambda} \log(s) \left( \frac{1}{c} - 1 \right) + \frac{\mu^2}{2\lambda} (\log(T) + 1)
\end{aligned}$$

By setting  $c = \frac{\mu}{\lambda} \sqrt{\frac{\log(s)}{2s}}$  and  $\mathbf{q}$  to be optimum, we have

$$\begin{aligned}
\max_{\mathbf{q}^* \in \Delta} \sum_t^T E[\mathcal{L}(\mathbf{q}^*, \theta_t) - \mathcal{L}(\mathbf{q}_t, \theta_t)] &\leq \mu \sqrt{2s \log(s)} - s\lambda \\
&\quad - \frac{\mu^2 \log(s)}{2\lambda} + \frac{\mu^2}{2\lambda} (\log(T) + 1) \\
&= \frac{\mu^2}{2\lambda} (\log(T) + 1) - \left( \mu \sqrt{\frac{\log(s)}{2\lambda}} - \sqrt{s\lambda} \right)^2
\end{aligned}$$
